# Supplementary material for: Producing methylcyclopentadiene dimer and trimer based high-performance jet fuels using 5-methyl furfural
Source: Royal Society of Chemistry journal article supplement (doi:10.1039/d0gc02361b), 2020-01-01
Supplement: d0gc02361b1.pdf [file d0gc02361b1.pdf]

# 1 Producing Methylcyclopentadiene Dimer and Trimer based High- 2 Performance Jet Fuels using 5-Methyl Furfural

3 Genkuo Nie, Chengxiang Shi, Yiyang Dai, Yanan Liu, Yakun Liu, Chi Ma, Qing Liu, Lun Pan, Xiangwen Zhang  
4 and Ji-Jun Zou\*

5 *Key Laboratory for Green Chemical Technology of the Ministry of Education, School of Chemical*  
6 *Engineering and Technology, Tianjin University; Collaborative Innovative Center of Chemical Science and*  
7 *Engineering (Tianjin), Tianjin 300072, China*

8 *Corresponding author. Tel and fax: 86-22-27892340. E-mail: jj\_zou@tju.edu.cn (J.-J. Zou).*

9

## 10 1 Materials

11 Unless stated, all chemicals and catalysts in this work were used directly after purchasing without any  
12 purification. 5-methyl furfural (MFF) (99%) was purchased from Shanghai Macklin Biochemical Co., Ltd. Urea(AR),  
13 Methanol (99.5%), dichloromethane (AR), NiCl<sub>2</sub>(AR), sodium hypophosphite (NaH<sub>2</sub>PO<sub>2</sub>, AR), ethanol (AR) and NaOH  
14 (AR) were bought from Tianjin Yuanli Chemical Co. Ltd. CeCl<sub>3</sub>·7H<sub>2</sub>O (AR) was purchased from Tianjin Heowns Co.  
15 LLC. NaBH<sub>4</sub> was purchased from Shanghai Aladdin Bio-Chem Technology Co., LTD. NaZSM-5 zeolite (SiO<sub>2</sub>/Al<sub>2</sub>O<sub>3</sub>=80)  
16 and HZSM-5 (SiO<sub>2</sub>/Al<sub>2</sub>O<sub>3</sub>=25) purchased from Nankai Catalysts Co., Ltd. were calcined in air at 550 °C for 6 h before  
17 use.

## 18 2 Experiment

### 19 2.1 Preparation of hierarchical HZSM-5

20 Hierarchical HZSM-5 was synthesized from NaZSM-5 according to our previous work<sup>1</sup>. 20 g of calcined NaZSM-5  
21 was heated in 200 mL of 0.5 M NaOH solution with stirring at 80 °C for 1 h. Then, the suspension was cooled to  
22 room temperature, filtered, washed with deionized water until neutral, dried at 80 °C for 12 h and calcined at 550  
23 °C for 5 h. Subsequently, the Na-form zeolites were transferred into H-form via a twice ion-exchange process with  
24 NH<sub>4</sub>NO<sub>3</sub> solution (1.5 M) at 100 °C for 4 h, and calcined at 550 °C in air for 5 h.

### 25 2.2 Synthesis of Ni<sub>2</sub>P

26 Ni<sub>2</sub>P was synthesized according to our previous work<sup>2</sup>. Typically, 0.24 mmol of NiCl<sub>2</sub> and 4.8 mmol of urea were  
27 dissolved in 100 mL of distilled water. After the mixture was stirred for 10 min, the mixed solution was kept at 90  
28 °C for 48 h. Finally, the precipitates were washed three times with water and ethanol, respectively, and dried at 80

29 °C for 6 h to obtain Ni(OH)<sub>2</sub>. To synthesize Ni<sub>2</sub>P, 200 mg of sodium hypophosphite (NaH<sub>2</sub>PO<sub>2</sub>) was put in the uptake  
30 and 30 mg of Ni(OH)<sub>2</sub> was put in the downtake, and then calcined at 325 °C for 1 h under Ar atmosphere to realize  
31 phosphorization of nickel. After that, the powders were washed for 3 times using deionized water to remove  
32 unconverted sodium hypophosphite, and then dried under 60 °C.

### 33 **2.3 Reductive ring-opening reaction of 5-methyl furfural (1) to 2,5-hexanedione (2)**

34 The reaction was performed in a 100 mL autoclave (EasyChem E100). 10 mL water and 30 mL dichloromethane  
35 as solvents, 1 g MFF, 50 mg Ni<sub>2</sub>P and 0.8 g commercial HZSM-5 were sealed in the reactor and hydrogenated under  
36 hydrogen pressure of 30 bar and 140 °C for 20 h. After the reaction, the organic layer was separated and the  
37 products was obtained by rotary evaporation for further use.

### 38 **2.4 Aldol condensation of 2 to 3-methyl-2-cyclopenten-1-one (3)**

39 The reaction was carried out in a round-bottom flask equipped with a reflux condenser and a mechanical stirrer.  
40 1.4 g of **2** and 4.7 mL of water were heated to 150 °C in oil bath and then 8.3 mg NaOH was added. The products  
41 were obtained by rotary evaporation.

### 42 **2.5 Selective hydrogenation of 3 to 3-methylcyclopent-2-en-1-ol (4)**

43 The reaction was carried out in a round-bottom flask equipped with a reflux condenser and a mechanical stirrer.  
44 154 mg of **3**, 3.2 mL methanol and 149 mg CeCl<sub>3</sub>·7H<sub>2</sub>O were stirred in ice-water mixture bath for 10 min, and then  
45 46 mg NaBH<sub>4</sub> was added. After 20 min, reaction was quenched with H<sub>2</sub>O, dichloromethane was added to recover  
46 the organic compounds. The products were obtained by rotary evaporation, and dichloromethane and methanol  
47 were recycled.

### 48 **2.6 Dehydration and oligomerization of 4 to DMCPD (5) or mixture of DMCPD (5) and TMCPD (6)**

49 For the synthesis of **5**, the reaction was carried out in a round-bottom flask equipped with a reflux condenser  
50 and a mechanical stirrer. 1.3 g hierarchical HZSM-5 (~ 5 wt%) was added into 25 g compound **4** and stirred at room  
51 temperature for 72 h. For the synthesis of mixture of **5** and **6**, 50 mL autoclave (EasyChem E50) was used. 25 g of  
52 compound **4** and 1.3 g hierarchical HZSM-5 (~ 5 wt%) were sealed in the reactor and heated to 150~220 °C for 15  
53 h. The product was obtained by filtration.

### 54 **2.7 Hydrogenation of 5 and 5/6 mixture to Fuel 1 and Fuel 2**

55 The hydrogenation of **5** and/or 5/6 mixture was carried out with 50 mL autoclave (EasyChem E50). The reactor  
56 was loaded with 25 g reactants and 1.5 g Ni<sub>2</sub>P (6 wt%) catalyst, sealed and purged with N<sub>2</sub> for 4 times to exclude  
57 air. Then it was heated to 150 °C and at 4 MPa of H<sub>2</sub> for 10 h. The product and catalyst were separated by filtration.

## 58 **3 Analytical method**

59 The products were determined qualitatively using an Agilent 6890/5975 gas chromatography-mass  
60 spectrometry (GC-MS) equipped with HP-5 capillary column (30 m × 0.5 mm) and <sup>13</sup>C and <sup>1</sup>H NMR spectra were  
61 collected using Bruker Avance 400 M Spectrometers spectrometer. The liquid products were quantified by a gas  
62 chromatography (Agilent-7820A) equipped with an FID detector and a capillary column HP-1 capillary column (30  
63 m × 0.53 mm).

#### 64 **4 Measurements of fuel properties**

65 The fuel density was measured by a Mettler Toledo DE40 density meter according to ASTM D4052. Freezing  
66 point was measured as outlined in ASTM D2386. Kinematic viscosity was determined using capillary viscometer  
67 (ASTM D445). The net heat of combustion (NHOC) was measured by the IKA-C6000 isoperibol Package 2/10  
68 Calorimeter (ASTM D240-02). Dynamic testing (JFTOT) was conducted continuously at 355 °C for 5 h in accordance  
69 with ASTM D3241.

70

71

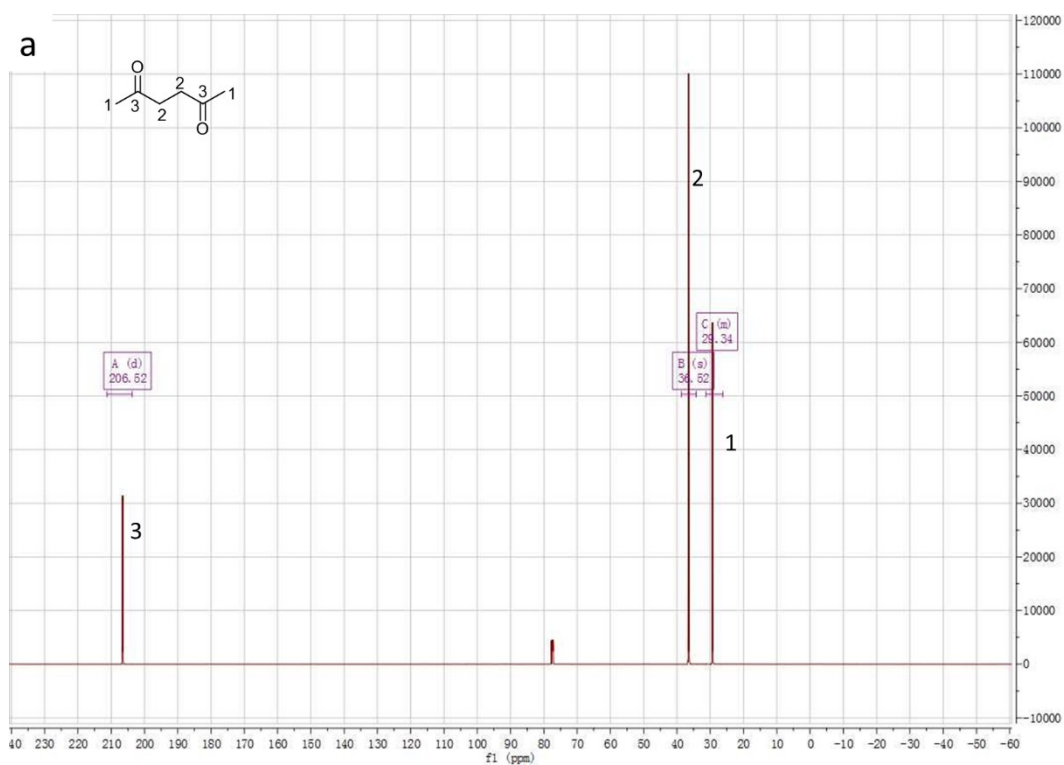

72

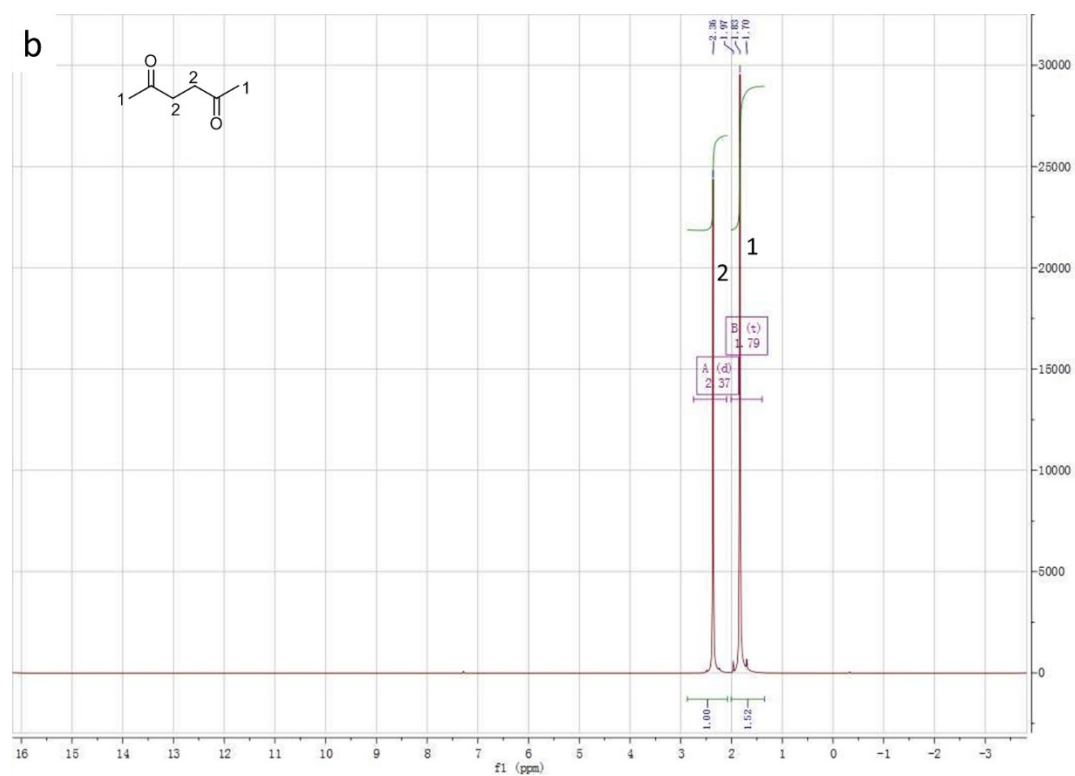73 **Figure S1**  $^{13}\text{C}$  (a) and  $^1\text{H}$  (b) NMR spectra of 2,5-hexanedione (HD)(2). a:  $^{13}\text{C}$  NMR (126 MHz,  $\text{CDCl}_3$ )  $\delta$  206.52 (d,  $J =$ 74 6.1 Hz), 36.52 (s), 31.31 – 26.19 (m). b:  $^1\text{H}$  NMR (500 MHz,  $\text{CDCl}_3$ )  $\delta$  2.37 (d,  $J = 4.3$  Hz, 1H), 1.79 (t,  $J = 34.3$  Hz, 2H).

75

76

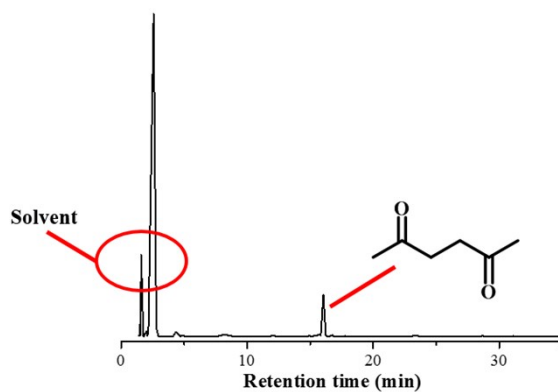

77

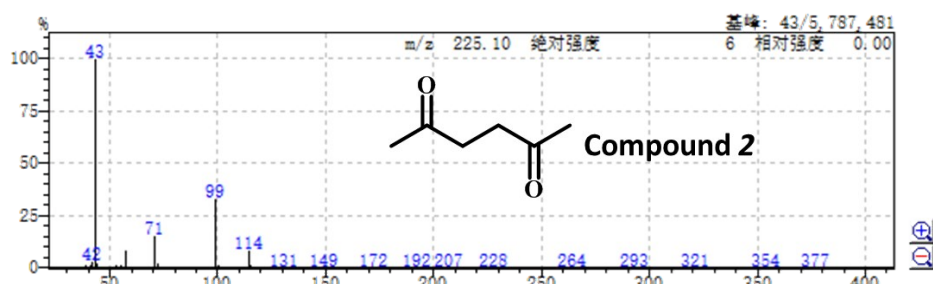

78

Figure S2 GC-MS spectra of 2,5-hexanedione (**2**) from the reductive ring-opening of 5-methyl furfural (**1**).

79

80

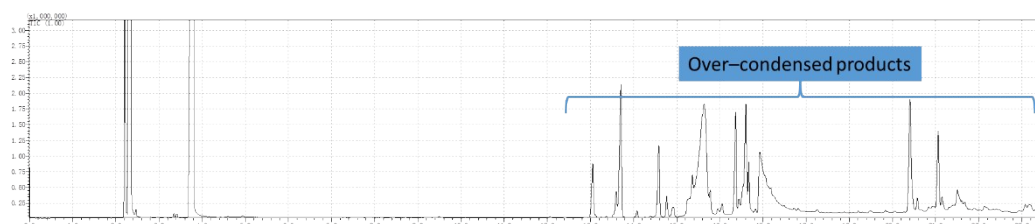

81

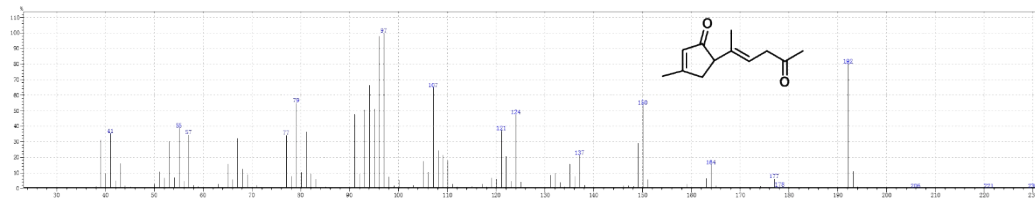

82

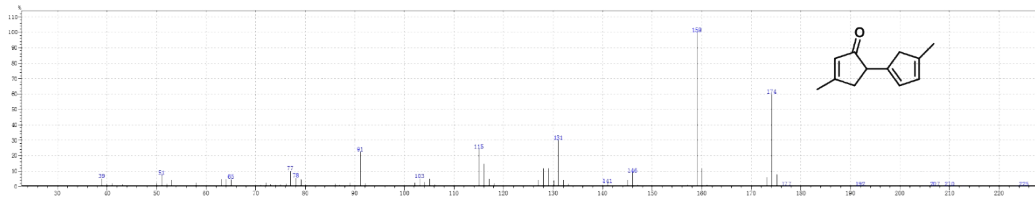

83

84

Figure S3 GC-MS spectra of products from the aldol condensation of HD (**2**) by strong alkaline.

85

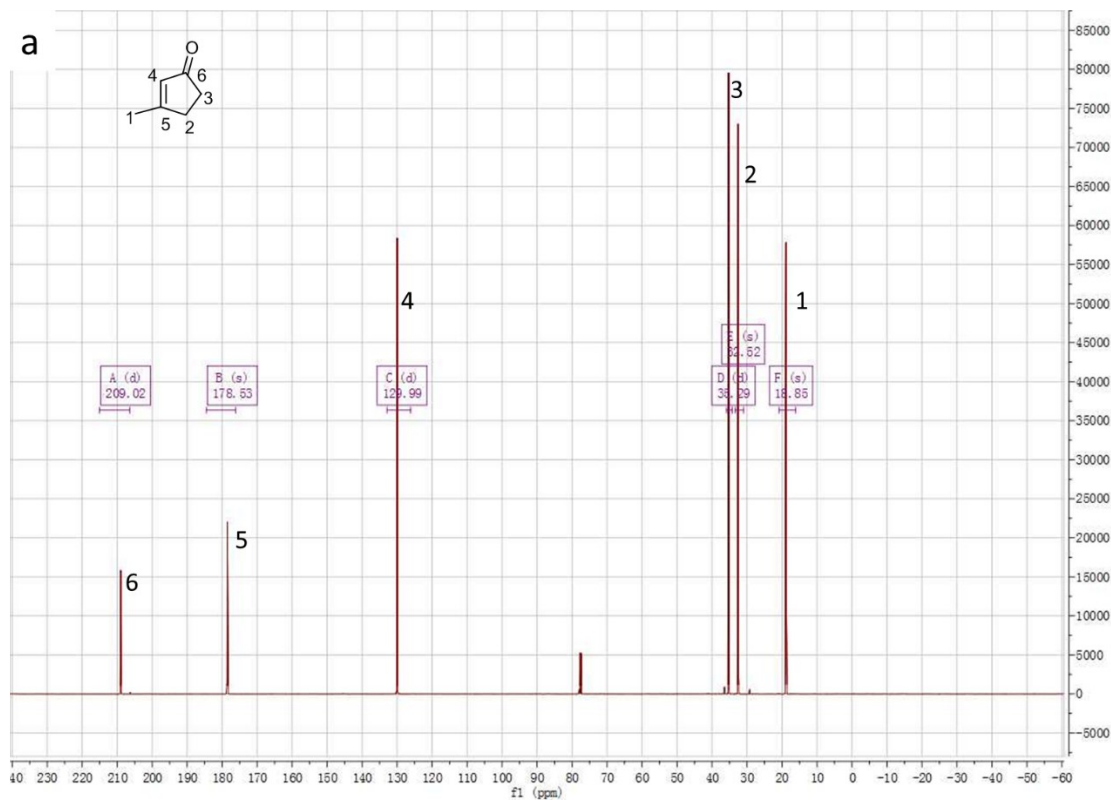

86

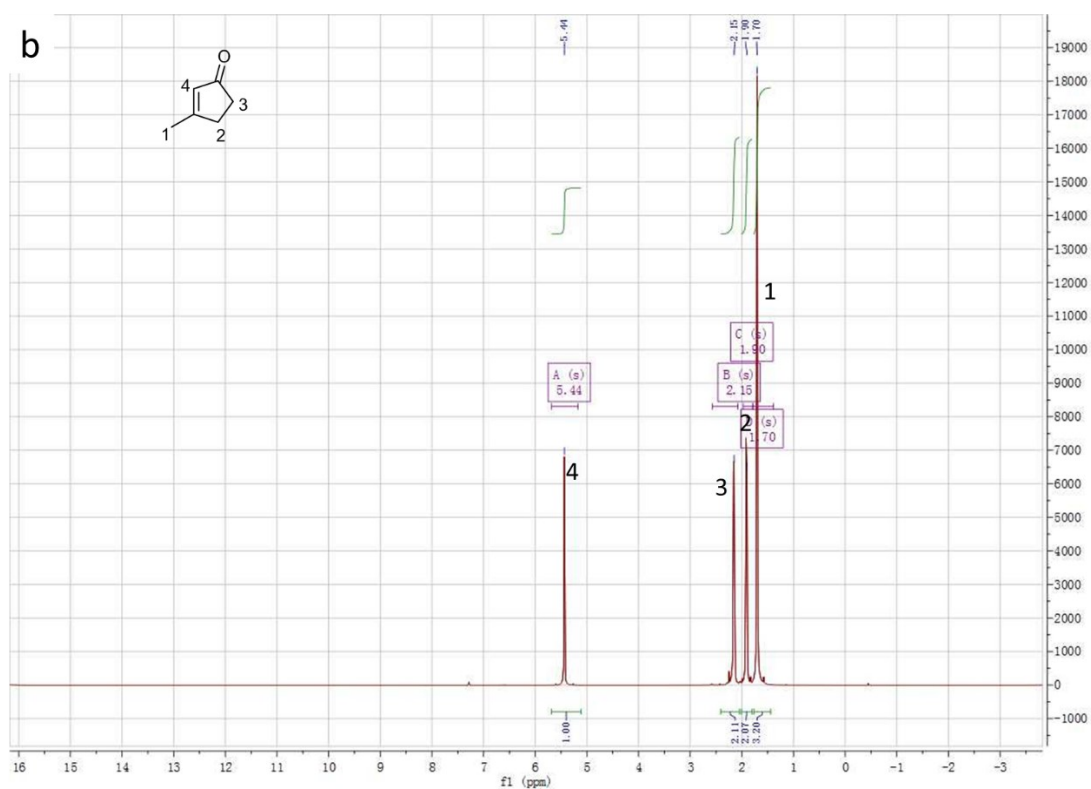

87

88 **Figure S4** <sup>13</sup>C (a) and <sup>1</sup>H (b) NMR spectra of 3-methyl-2-cyclopenten-1-one (**3**). a: <sup>13</sup>C NMR (126 MHz, CDCl<sub>3</sub>) δ

89 209.02 (d, *J* = 2.6 Hz), 178.53 (s), 129.99 (d, *J* = 8.2 Hz), 35.29 (d, *J* = 8.1 Hz), 32.52 (s), 18.85 (s). b: <sup>1</sup>H NMR (500

90

MHz, CDCl<sub>3</sub>) δ 5.44 (s, 1H), 2.15 (s, 2H), 1.90 (s, 2H), 1.70 (s, 3H).

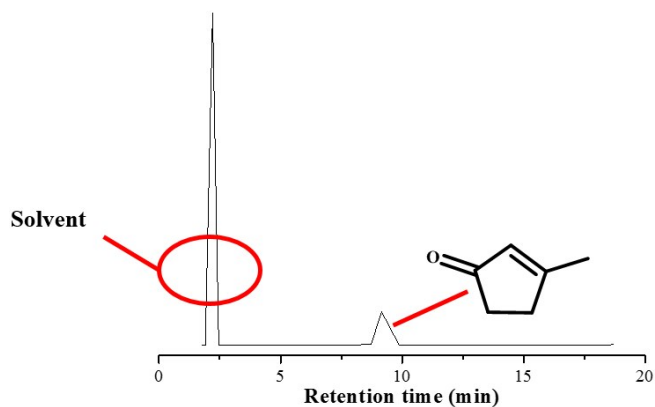

91

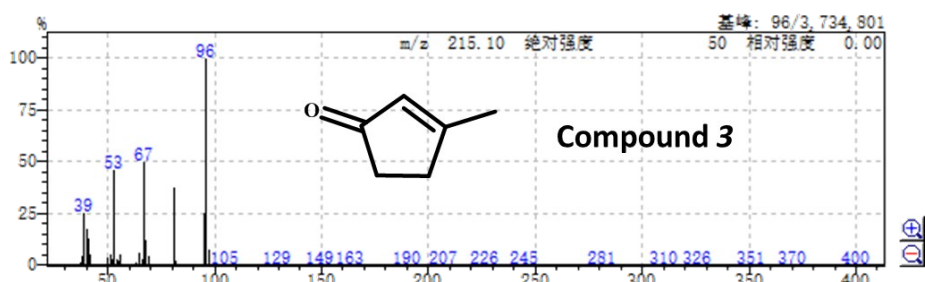

92

93

94

Figure S5 GC-MS spectra of 3-methyl-2-cyclopenten-1-one (**3**) by aldol condensation of HD (**2**).

| Table S1 Reaction conditions for conversion of <b>3</b> to <b>4</b> . |                |               |                                                                   |                       |                       |
|-----------------------------------------------------------------------|----------------|---------------|-------------------------------------------------------------------|-----------------------|-----------------------|
| Entry                                                                 | Substrate (mg) | Sol./Vol.(mL) | Reducing agents/mass (mg)                                         | Conv. of <b>3</b> (%) | Yield of <b>4</b> (%) |
| 1 <sup>a</sup>                                                        | 96             | methanol/2.5  | NaBH <sub>4</sub> /38                                             | 95                    | 36.1                  |
| 2 <sup>a</sup>                                                        | 96             | methanol/2.5  | NaBH <sub>4</sub> /CeCl <sub>3</sub> ·7H <sub>2</sub> O 38/373    | 100                   | 99                    |
| 3 <sup>b</sup>                                                        | 154            | methanol/3.2  | NaBH <sub>4</sub> /CeCl <sub>3</sub> ·7H <sub>2</sub> O<br>46/149 | 100                   | 98.5                  |

<sup>a</sup> Reference <sup>3</sup>; <sup>b</sup> Room temperature

95

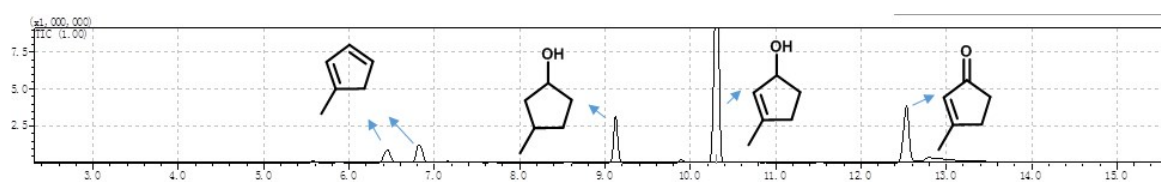

96

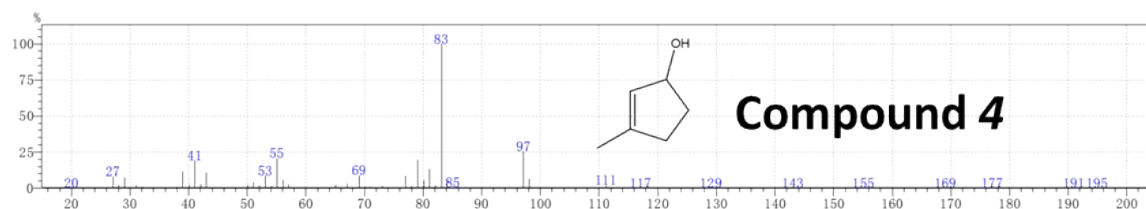

97

98

Figure S6 GC-MS spectra of 3-methylcyclopent-2-en-1-ol (**4**) from the selective hydrogenation of **3**.

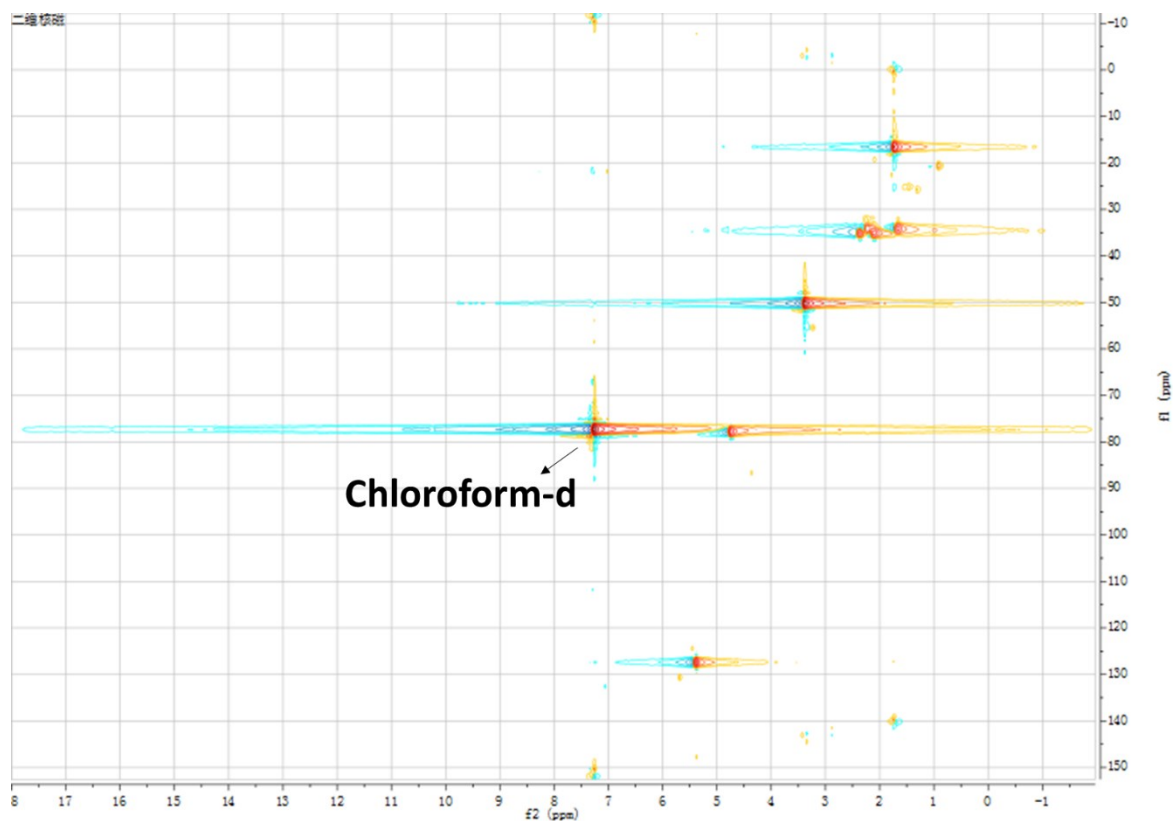

99  
100  
101

Figure S7 The 2D-HSQC NMR spectra of 3-methylcyclopent-2-en-1-ol (**4**).

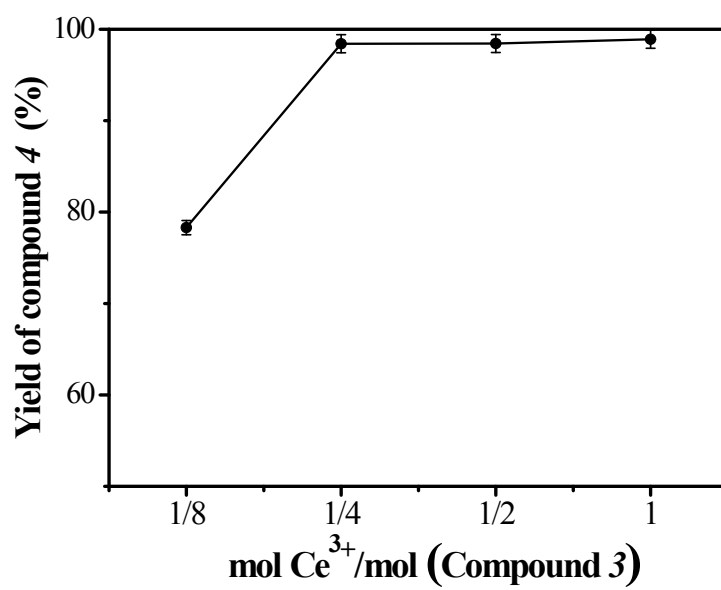

102  
103

Figure S8 Effect of molar ratio of [Ce<sup>3+</sup>]/[Compound **3**] on reaction.



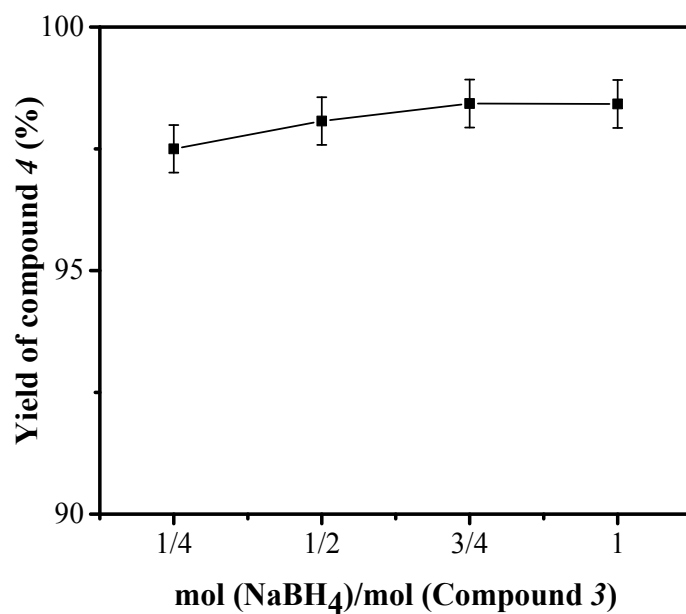

104

105

**Figure S9** Effect of molar ratio of [NaBH<sub>4</sub>]/[Compound 3] on reaction.

106

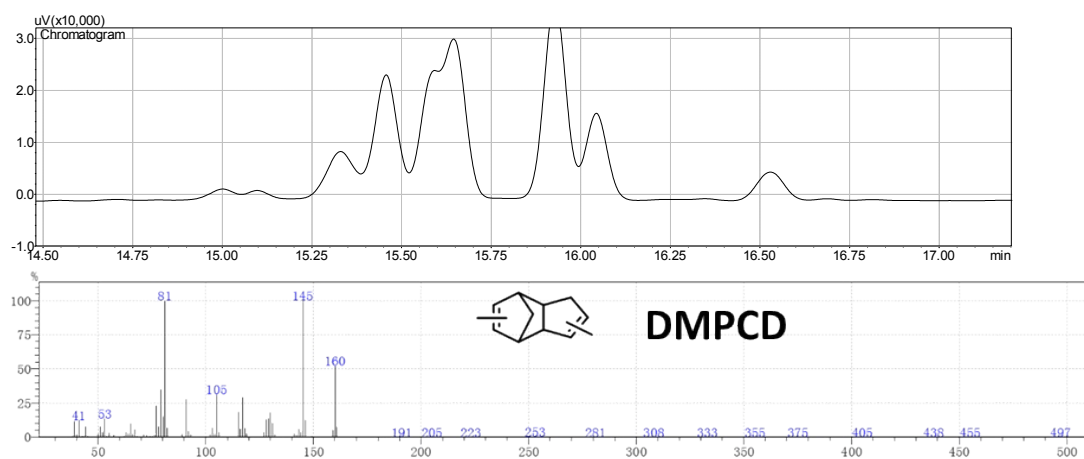

107

108

109

**Figure S10** GC-MS chromatogram of DMCPD from compound 4

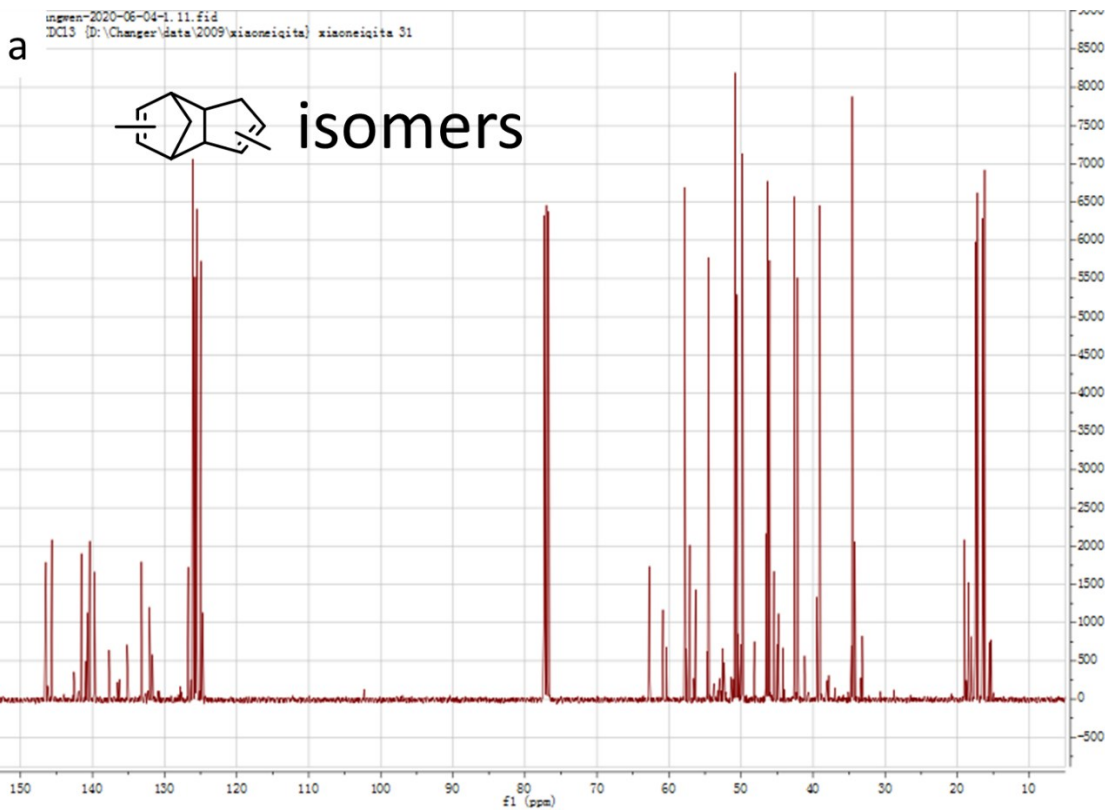

110

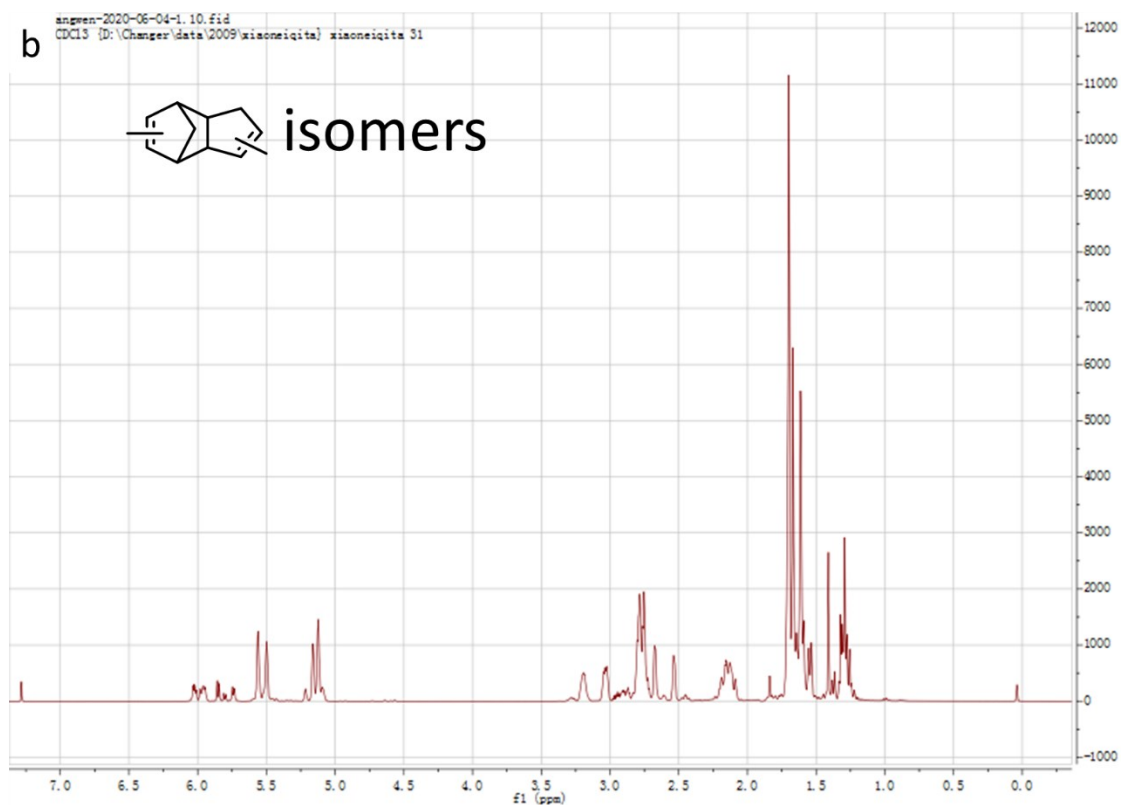

111

112

**Figure S11**  $^{13}\text{C}$ (a) and  $^1\text{H}$  (b) NMR spectra of DMCPD from compound **4**.

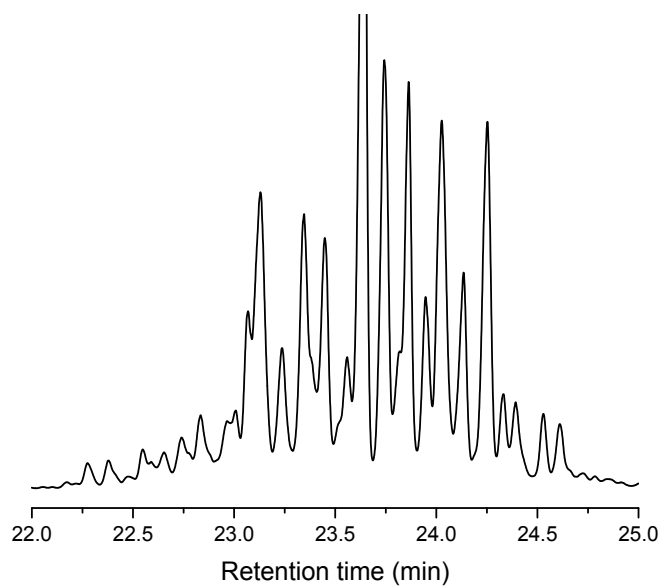

113

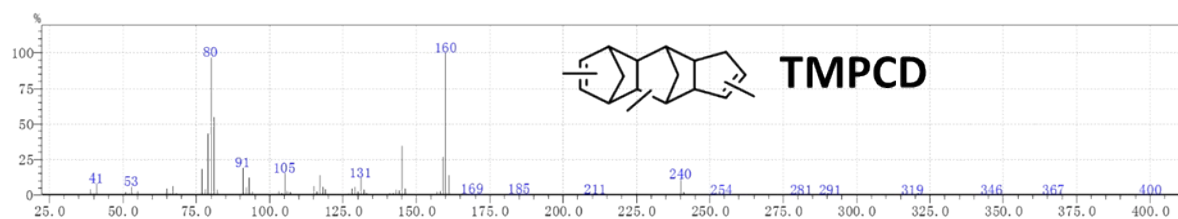

114

115

116

Figure S12 GC-MS chromatogram of TMPCD from compound 4.

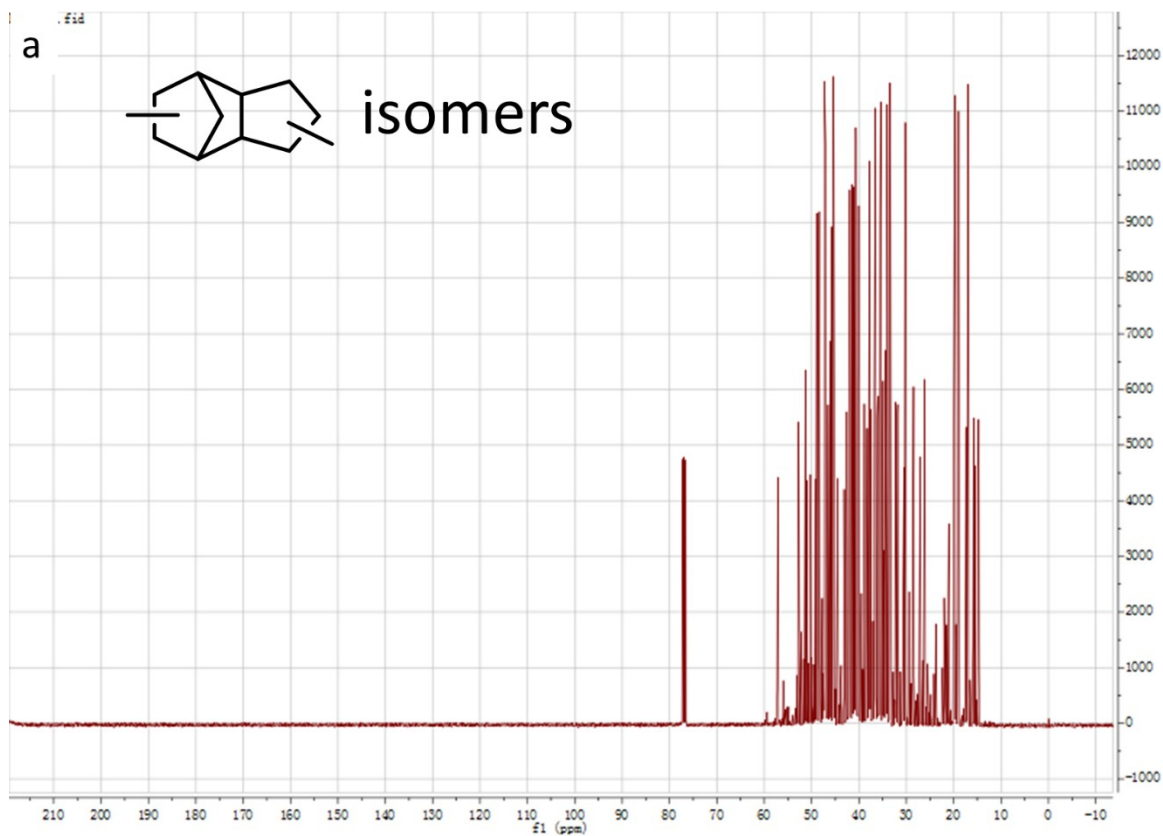

117

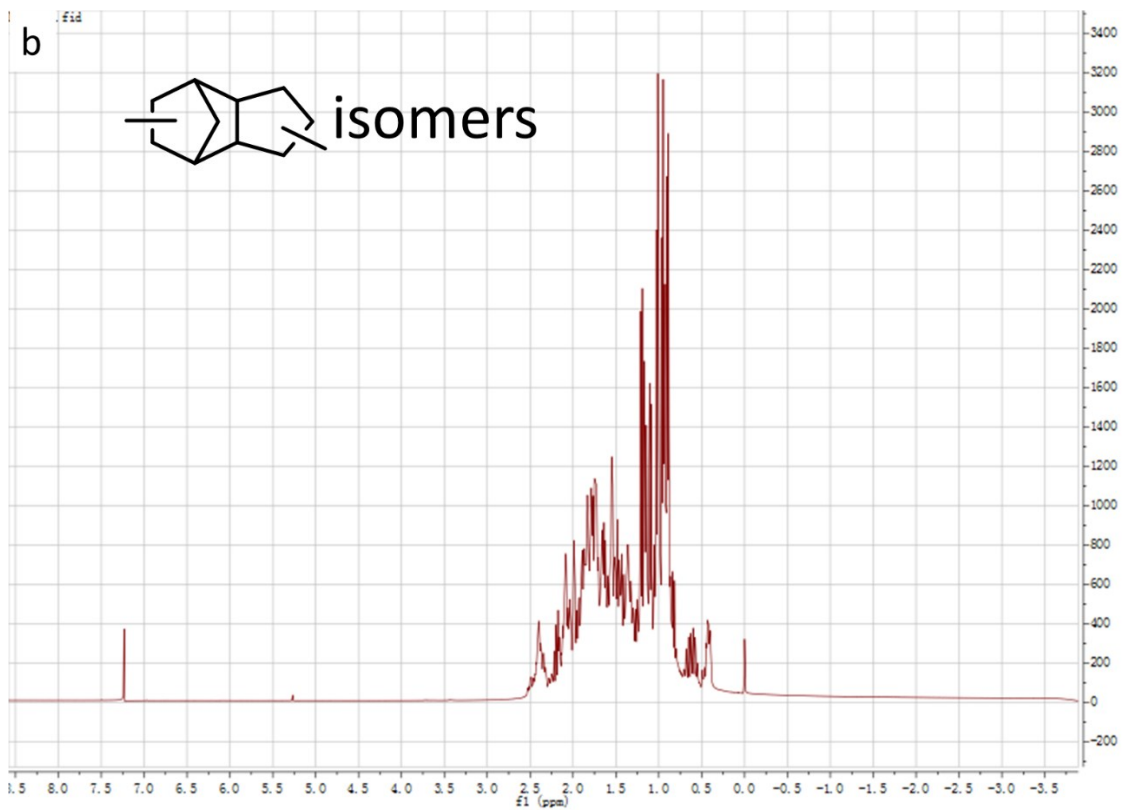

118  
119  
120

Figure S13  $^{13}\text{C}$ (a) and  $^1\text{H}$  (b) NMR spectra of DMCPD derived fuels.

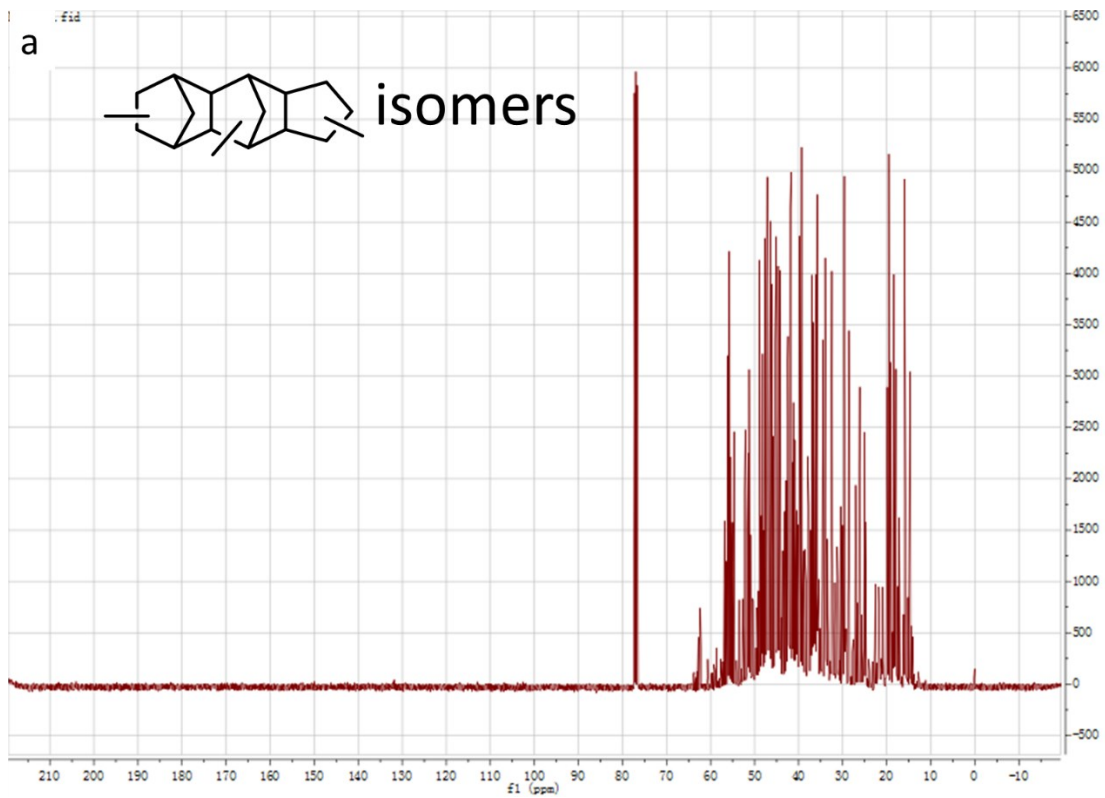

121

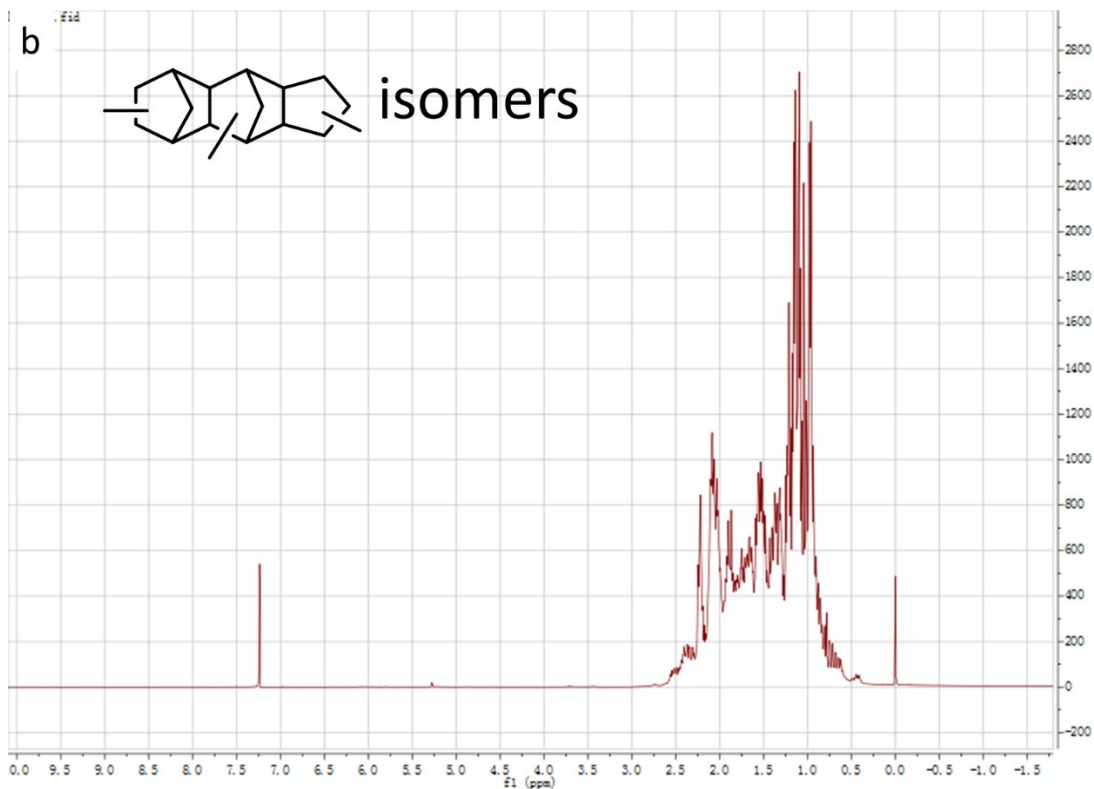

122  
123

Figure S14 <sup>13</sup>C(a) and <sup>1</sup>H (b) NMR spectra of TMPCD derived fuels.

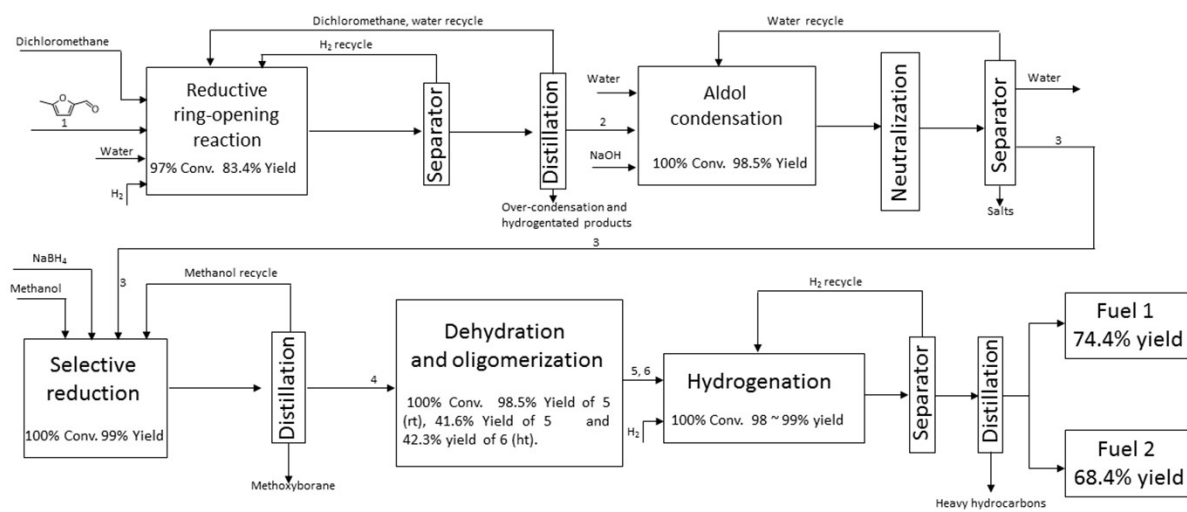

124  
125

126 **Figure S15** Conceptual diagram of integrated biorefinery for synthesis of DMPCD /TMPCD derived fuels from  
127 biomass (rt: room temperature; ht: high temperature).

128 **References**

- 129 1. Q. Deng, X. Zhang, L. Wang and J.-J. Zou, *Chemical Engineering Science*, 2015, **135**, 540-546.  
130 2. R. Gao, L. Pan, H. Wang, Y. Yao, X. Zhang, L. Wang and J.-J. Zou, *Advanced Science*, 2019, **6**,  
131 1900054.  
132 3. J. L. Luche, *Journal of the American Chemical Society*, 1978, **100**, 2226-2227.

133
